# Supplementary material for: Anemonefish facilitate bleaching recovery in a host sea anemone
Source: PubMed Central journal article supplement (PMC7596230; doi:10.1038/s41598-020-75585-6), 2020-10-29
Supplement: 41598_2020_75585_MOESM1_ESM.pdf [file 41598_2020_75585_MOESM1_ESM.pdf]

## **Anemonefish facilitate bleaching recovery in a host sea anemone**

**Sophie H Pryor<sup>1</sup>, Ross Hill<sup>2</sup>, Danielle L Dixson<sup>3</sup>, Nicola J Fraser<sup>1</sup>, Brendan P Kelaher<sup>1</sup>,  
Anna Scott<sup>1\*</sup>**

<sup>1</sup>National Marine Science Centre, Marine Ecology Research Centre, School of Environment,  
Science and Engineering, Southern Cross University, P.O. Box 4321, Coffs Harbour, NSW,  
2450, Australia

<sup>2</sup>Macquarie University, Sydney, NSW, 2109, Australia

<sup>3</sup>School of Marine Science and Policy, University of Delaware, Lewes, DE 19958, USA

\*Corresponding author email: [anna.scott@scu.edu.au](mailto:anna.scott@scu.edu.au)

## Supporting information

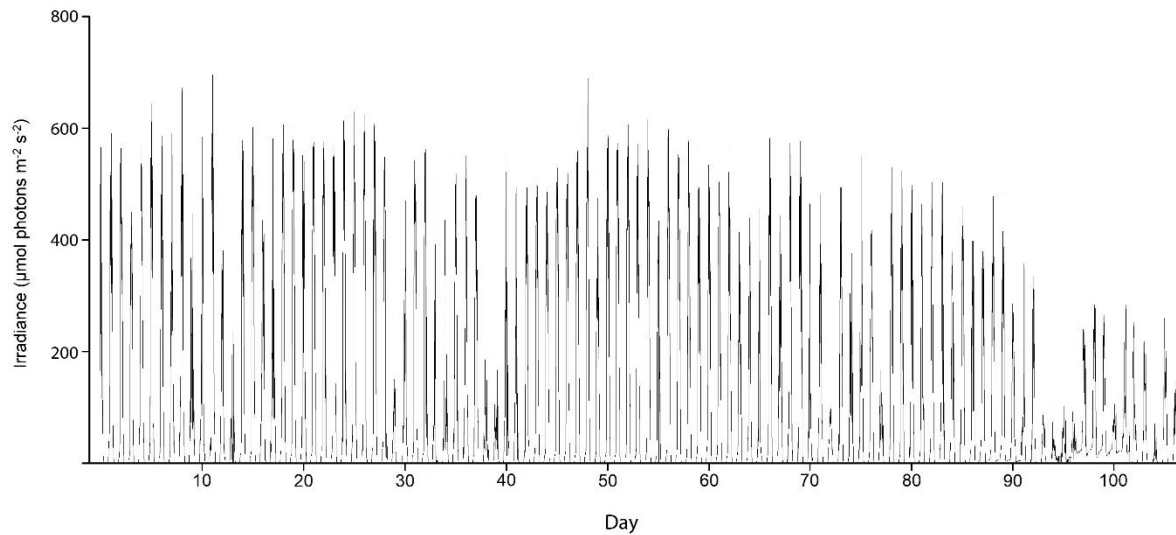

**Supporting Figure 1: Irradiance ( $\mu\text{mol photons m}^{-2} \text{s}^{-2}$ ) during the bleaching recovery period.**

**Supporting Table 1: P-values calculated from PERMANOVA to test hypotheses. Asterisks (\*) indicate where the null hypothesis was rejected.  $\pm$  = SE.**

| Hypothesis                                               | Symbiodiniaceae<br>density                                                 | Total chlorophyll mg<br>host protein <sup>-1</sup>         | Colour score                                                |
|----------------------------------------------------------|----------------------------------------------------------------------------|------------------------------------------------------------|-------------------------------------------------------------|
| Treatment effect                                         | P = 0.003*                                                                 | P < 0.001*                                                 | P < 0.001*                                                  |
| Bleached control = bleached<br>procedural control        | 0.2888                                                                     | 0.4178                                                     | 0.9214                                                      |
| Unbleached control =<br>Unbleached procedural<br>control | 0.2694                                                                     | 0.9708                                                     | 0.7200                                                      |
| Bleached with fish =<br>unbleached controls (pooled)     | P = 0.877*<br>Means = 1232242 $\pm$<br>291741.0, 1017974 $\pm$<br>120879.8 | P = 0.005<br>Means = 8.98 $\pm$ 1.610,<br>5.42 $\pm$ 0.373 | P = 0.609*<br>Means = 4.75 $\pm$ 0.299,<br>4.94 $\pm$ 0.144 |

|                              |                                                      |                                        |                                       |
|------------------------------|------------------------------------------------------|----------------------------------------|---------------------------------------|
| Bleached controls (pooled) < | P = 0.002*                                           | P = 0.125                              | P < 0.001*                            |
| unbleached controls (pooled) | Means = 228801 ±<br>98744.2, 1017974 ±<br>120879.8   | Means = 2.71 ± 0.434,<br>5.42 ± 0.373  | Means = 2.66 ± 0.338,<br>4.94 ± 0.144 |
| Unbleached with fish >       | P = 0.021*                                           | P = 0.106                              | P = 0.033                             |
| Bleached with fish           | Means = 2152018 ±<br>223212.0, 1232242 ±<br>291741.0 | Means = 11.78 ± 1.057,<br>8.98 ± 1.610 | Means = 5.63 ± 0.183,<br>4.75 ± 0.299 |
| Unbleached with fish >       | P < 0.001*                                           | P < 0.001*                             | P = 0.004*                            |
| Unbleached controls (pooled) | Means = 2152018 ±<br>223212.0, 1017974 ±<br>120879.8 | Means = 11.78 ± 1.057,<br>5.42 ± 0.373 | Means = 5.63 ± 0.183,<br>4.94 ± 0.144 |
